# Supplementary material for: Potential health impact of increasing adoption of sustainable dietary practices in Sweden
Source: Springer Nature journal article supplement (doi:10.1186/s12889-021-11256-z), 2021-07-06
Supplement: MOESM1 [file 19336582]

Table 1 Cumulative gains in YLL over 20 or 30 years, per sex and disease outcome

|                                                                         | Ischaemic heart disease |                  | Stroke   |                | Diabetes type 2 |                | Colorectal cancer |                | Sum      |                  |
|-------------------------------------------------------------------------|-------------------------|------------------|----------|----------------|-----------------|----------------|-------------------|----------------|----------|------------------|
|                                                                         | Estimate                | Lower-Upper      | Estimate | Lower-Upper    | Estimate        | Lower-Upper    | Estimate          | Lower-Upper    | Estimate | Lower-Upper      |
| Women, cumulative gains in YLL over 20 years                            |                         |                  |          |                |                 |                |                   |                |          |                  |
| <b>Replacing red &amp; processed meat with poultry/fish<sup>#</sup></b> |                         |                  |          |                |                 |                |                   |                |          |                  |
| 25% less red & processed meat*                                          | 48130                   | (2603 – 74714)   | 0        | (0 – 0)        | 4823            | (2085 – 6979)  | 504               | (212 – 803)    | 53457    | (4901 – 82496)   |
| 50% less red & processed meat                                           | 93346                   | (5198 – 142362)  | 0        | (0 – 0)        | 9230            | (4092 – 13087) | 990               | (422 – 1560)   | 103566   | (9712 – 157009)  |
| No red or processed meat                                                | 175013                  | (10323 – 257879) | 0        | (0 – 0)        | 16888           | (7858 – 23051) | 1905              | (828 – 2938)   | 193806   | (19008 – 283867) |
| <b>Replacing red &amp; processed meat with vegetables</b>               |                         |                  |          |                |                 |                |                   |                |          |                  |
| 25% less red & processed meat                                           | 62777                   | (8362 – 98455)   | 4635     | (1023 – 7787)  | 4823            | (2085 – 6979)  | 504               | (212 – 803)    | 72740    | (11682 – 114023) |
| 50% less red & processed meat**                                         | 120500                  | (16602 – 184455) | 9143     | (2034 – 15243) | 9230            | (4092 – 13087) | 990               | (422 – 1560)   | 139863   | (23151 – 214345) |
| No red or processed meat                                                | 221881                  | (32821 – 324147) | 17891    | (4049 – 29386) | 16888           | (7858 – 23051) | 1905              | (828 – 2938)   | 258565   | (45556 – 379521) |
| <b>Replacing red &amp; processed meat with vegetables and legumes</b>   |                         |                  |          |                |                 |                |                   |                |          |                  |
| 25% less red & processed meat                                           | 83589                   | (18370 – 127005) | 2317     | (509 – 3907)   | 4823            | (2085 – 6979)  | 504               | (212 – 803)    | 91233    | (21176 – 138693) |
| 50% less red & processed meat                                           | 158684                  | (36499 – 233860) | 4635     | (1023 – 7787)  | 9230            | (4092 – 13087) | 990               | (422 – 1560)   | 173540   | (42036 – 256294) |
| No red or processed meat***                                             | 284144                  | (71117 – 395337) | 9143     | (2034 – 15243) | 16888           | (7858 – 23051) | 1905              | (828 – 2938)   | 312079   | (81837 – 436569) |
| <b>Replacing milk consumption with plant-based drink<sup>#</sup></b>    |                         |                  |          |                |                 |                |                   |                |          |                  |
| 25% less milk intake*                                                   | 0                       | (0 – 0)          | 0        | (0 – 0)        | 0               | (0 – 0)        | -283              | (-109 – -504)  | -283     | (-109 – -504)    |
| 50% less milk intake**                                                  | 0                       | (0 – 0)          | 0        | (0 – 0)        | 0               | (0 – 0)        | -571              | (-219 – -1026) | -571     | (-219 – -1026)   |
| No milk intake***                                                       | 0                       | (0 – 0)          | 0        | (0 – 0)        | 0               | (0 – 0)        | -1165             | (-440 – -2125) | -1165    | (-440 – -2125)   |
| <b>Replacing SSB consumption with water<sup>#</sup></b>                 |                         |                  |          |                |                 |                |                   |                |          |                  |
| 25% less SSB intake*                                                    | 11230                   | (-2623 – 21994)  | 0        | (0 – 0)        | 823             | (418 – 1208)   | 0                 | (0 – 0)        | 12053    | (-2205 – 23202)  |
| 50% less SSB intake**                                                   | 22303                   | (-5254 – 43383)  | 0        | (0 – 0)        | 1634            | (833 – 2389)   | 0                 | (0 – 0)        | 23937    | (-4421 – 45772)  |
| No SSB intake***                                                        | 43926                   | (-10528 – 84291) | 0        | (0 – 0)        | 3215            | (1651 – 4671)  | 0                 | (0 – 0)        | 47141    | (-8877 – 88961)  |
| * Combination “Minor changes” (sum)                                     | 59361                   | (-20 – 96708)    | 0        | (0 – 0)        | 5646            | (2503 – 8187)  | 221               | (103 – 299)    | 65228    | (2587 – 105194)  |
| ** Combination “Moderate changes” (sum)                                 | 142803                  | (11348 – 227838) | 9143     | (2034 – 15243) | 10864           | (4925 – 15477) | 419               | (203 – 534)    | 163229   | (18510 – 259092) |
| *** Combination “Extensive changes” (sum)                               | 328069                  | (60588 – 479628) | 9143     | (2034 – 15243) | 20103           | (9509 – 27721) | 740               | (387 – 813)    | 358056   | (72519 – 523405) |

SSB, sugar-sweetened beverages.

Replacements were of equal weight. Vegetables and legumes were 50:50. Numbers rounded to nearest 100.

<sup>#</sup>Replacement food category was neutral in the health impact model.

Table 1 (continued) Cumulative gains in YLL over 20 or 30 years, per sex and disease outcome

|                                                                         | Ischaemic heart disease |                    | Stroke   |                | Diabetes type 2 |                 | Colorectal cancer |                  | Sum      |                    |
|-------------------------------------------------------------------------|-------------------------|--------------------|----------|----------------|-----------------|-----------------|-------------------|------------------|----------|--------------------|
|                                                                         | Estimate                | Lower-Upper        | Estimate | Lower-Upper    | Estimate        | Lower-Upper     | Estimate          | Lower-Upper      | Estimate | Lower-Upper        |
| Women, cumulative gains in YLL over 30 years                            |                         |                    |          |                |                 |                 |                   |                  |          |                    |
| <b>Replacing red &amp; processed meat with poultry/fish<sup>#</sup></b> |                         |                    |          |                |                 |                 |                   |                  |          |                    |
| 25% less red & processed meat*                                          | 104378                  | (5639 – 162149)    | 0        | (0 – 0)        | 10573           | (4571 – 15300)  | 4493              | (1893 – 7156)    | 119444   | (12102 – 184604)   |
| 50% less red & processed meat                                           | 202688                  | (11260 – 309547)   | 0        | (0 – 0)        | 20237           | (8971 – 28696)  | 8827              | (3757 – 13905)   | 231752   | (23988 – 352148)   |
| No red or processed meat                                                | 380892                  | (22363 – 562568)   | 0        | (0 – 0)        | 37033           | (17228 – 50554) | 16985             | (7376 – 26204)   | 434910   | (46967 – 639326)   |
| <b>Replacing red &amp; processed meat with vegetables</b>               |                         |                    |          |                |                 |                 |                   |                  |          |                    |
| 25% less red & processed meat                                           | 136197                  | (18113 – 213814)   | 9915     | (2187 – 16657) | 10573           | (4571 – 15300)  | 4493              | (1893 – 7156)    | 161179   | (26763 – 252927)   |
| 50% less red & processed meat**                                         | 261849                  | (35973 – 401549)   | 19560    | (4351 – 32617) | 20237           | (8971 – 28696)  | 8827              | (3757 – 13905)   | 310473   | (53052 – 476767)   |
| No red or processed meat                                                | 483539                  | (71147 – 708489)   | 38285    | (8661 – 62908) | 37033           | (17228 – 50554) | 16985             | (7376 – 26204)   | 575842   | (104412 – 848155)  |
| <b>Replacing red &amp; processed meat with vegetables and legumes</b>   |                         |                    |          |                |                 |                 |                   |                  |          |                    |
| 25% less red & processed meat                                           | 181455                  | (39805 – 276035)   | 4955     | (1088 – 8356)  | 10573           | (4571 – 15300)  | 4493              | (1893 – 7156)    | 201476   | (47356 – 306846)   |
| 50% less red & processed meat                                           | 345195                  | (79129 – 509819)   | 9915     | (2187 – 16657) | 20237           | (8971 – 28696)  | 8827              | (3757 – 13905)   | 384174   | (94044 – 569078)   |
| No red or processed meat***                                             | 620334                  | (154325 – 865894)  | 19560    | (4351 – 32617) | 37033           | (17228 – 50554) | 16985             | (7376 – 26204)   | 693912   | (183280 – 975269)  |
| <b>Replacing milk consumption with plant-based drink<sup>#</sup></b>    |                         |                    |          |                |                 |                 |                   |                  |          |                    |
| 25% less milk intake*                                                   | 0                       | (0 – 0)            | 0        | (0 – 0)        | 0               | (0 – 0)         | -2519             | (-970 – -4490)   | -2519    | (-970 – -4490)     |
| 50% less milk intake**                                                  | 0                       | (0 – 0)            | 0        | (0 – 0)        | 0               | (0 – 0)         | -5089             | (-1948 – -9139)  | -5089    | (-1948 – -9139)    |
| No milk intake***                                                       | 0                       | (0 – 0)            | 0        | (0 – 0)        | 0               | (0 – 0)         | -10376            | (-3923 – -18926) | -10376   | (-3923 – -18926)   |
| <b>Replacing SSB consumption with water<sup>#</sup></b>                 |                         |                    |          |                |                 |                 |                   |                  |          |                    |
| 25% less SSB intake*                                                    | 24330                   | (-5680 – 47663)    | 0        | (0 – 0)        | 1804            | (916 – 2647)    | 0                 | (0 – 0)          | 26134    | (-4764 – 50310)    |
| 50% less SSB intake**                                                   | 48334                   | (-11378 – 94070)   | 0        | (0 – 0)        | 3581            | (1826 – 5238)   | 0                 | (0 – 0)          | 51915    | (-9552 – 99308)    |
| No SSB intake***                                                        | 95248                   | (-22795 – 182980)  | 0        | (0 – 0)        | 7048            | (3619 – 10239)  | 0                 | (0 – 0)          | 102297   | (-19176 – 193220)  |
| * Combination “Minor changes” (sum)                                     | 128707                  | (-41 – 209812)     | 0        | (0 – 0)        | 12376           | (5487 – 17947)  | 1974              | (922 – 2666)     | 143058   | (6368 – 230425)    |
| ** Combination “Moderate changes” (sum)                                 | 310183                  | (24595 – 495619)   | 19560    | (4351 – 32617) | 23818           | (10797 – 33934) | 3738              | (1809 – 4767)    | 357298   | (41552 – 566936)   |
| *** Combination “Extensive changes” (sum)                               | 715583                  | (131530 – 1048874) | 19560    | (4351 – 32617) | 44081           | (20847 – 60794) | 6609              | (3452 – 7278)    | 785832   | (160181 – 1149562) |

SSB, sugar-sweetened beverages.

Replacements were of equal weight. Vegetables and legumes were 50:50. Numbers rounded to nearest 100.

<sup>#</sup>Replacement food category was neutral in the health impact model.

Table 1 (continued) Cumulative gains in YLL over 20 or 30 years, per sex and disease outcome

|                                                                         | Ischaemic heart disease |                   | Stroke   |                | Diabetes type 2 |                 | Colorectal cancer |                | Sum      |                   |
|-------------------------------------------------------------------------|-------------------------|-------------------|----------|----------------|-----------------|-----------------|-------------------|----------------|----------|-------------------|
|                                                                         | Estimate                | Lower-Upper       | Estimate | Lower-Upper    | Estimate        | Lower-Upper     | Estimate          | Lower-Upper    | Estimate | Lower-Upper       |
| Men, cumulative gains in YLL over 20 years                              |                         |                   |          |                |                 |                 |                   |                |          |                   |
| <b>Replacing red &amp; processed meat with poultry/fish<sup>#</sup></b> |                         |                   |          |                |                 |                 |                   |                |          |                   |
| 25% less red & processed meat*                                          | 111583                  | (6166 – 170983)   | 0        | (0 – 0)        | 10334           | (4588 – 14715)  | 930               | (399 – 1466)   | 122847   | (11153 – 187163)  |
| 50% less red & processed meat                                           | 211641                  | (12297 – 314688)  | 0        | (0 – 0)        | 19228           | (8892 – 26503)  | 1807              | (789 – 2799)   | 232676   | (21978 – 343989)  |
| No red or processed meat                                                | 380577                  | (24401 – 534512)  | 0        | (0 – 0)        | 33374           | (16676 – 43384) | 3401              | (1535 – 5093)  | 417352   | (42613 – 582989)  |
| <b>Replacing red &amp; processed meat with vegetables</b>               |                         |                   |          |                |                 |                 |                   |                |          |                   |
| 25% less red & processed meat                                           | 143405                  | (19290 – 220936)  | 6239     | (1384 – 10427) | 10334           | (4588 – 14715)  | 930               | (399 – 1466)   | 160908   | (25662 – 247544)  |
| 50% less red & processed meat**                                         | 267691                  | (38241 – 396036)  | 12251    | (2758 – 20219) | 19228           | (8892 – 26503)  | 1807              | (789 – 2799)   | 300978   | (50680 – 445557)  |
| No red or processed meat                                                | 467108                  | (75090 – 641209)  | 23626    | (5471 – 38046) | 33374           | (16676 – 43385) | 3401              | (1535 – 5093)  | 527509   | (98772 – 727732)  |
| <b>Replacing red &amp; processed meat with vegetables and legumes</b>   |                         |                   |          |                |                 |                 |                   |                |          |                   |
| 25% less red & processed meat                                           | 188304                  | (42158 – 280044)  | 3148     | (694 – 5295)   | 10334           | (4588 – 14715)  | 930               | (399 – 1466)   | 202716   | (47839 – 301520)  |
| 50% less red & processed meat                                           | 343449                  | (82688 – 485920)  | 6239     | (1384 – 10427) | 19228           | (8892 – 26503)  | 1807              | (789 – 2799)   | 370723   | (93753 – 525648)  |
| No red or processed meat***                                             | 574058                  | (159024 – 743335) | 12251    | (2758 – 20219) | 33374           | (16676 – 43384) | 3401              | (1535 – 5093)  | 623085   | (179993 – 812032) |
| <b>Replacing milk consumption with plant-based drink<sup>#</sup></b>    |                         |                   |          |                |                 |                 |                   |                |          |                   |
| 25% less milk intake*                                                   | 0                       | (0 – 0)           | 0        | (0 – 0)        | 0               | (0 – 0)         | -415              | (-160 – -742)  | -415     | (-160 – -742)     |
| 50% less milk intake**                                                  | 0                       | (0 – 0)           | 0        | (0 – 0)        | 0               | (0 – 0)         | -841              | (-321 – -1518) | -841     | (-321 – -1518)    |
| No milk intake***                                                       | 0                       | (0 – 0)           | 0        | (0 – 0)        | 0               | (0 – 0)         | -1727             | (-648 – -3181) | -1727    | (-648 – -3181)    |
| <b>Replacing SSB consumption with water<sup>#</sup></b>                 |                         |                   |          |                |                 |                 |                   |                |          |                   |
| 25% less SSB intake*                                                    | 23537                   | (-5523 – 45926)   | 0        | (0 – 0)        | 1629            | (829 – 2387)    | 0                 | (0 – 0)        | 25166    | (-4694 – 48313)   |
| 50% less SSB intake**                                                   | 46650                   | (-11094 – 90075)  | 0        | (0 – 0)        | 3227            | (1652 – 4704)   | 0                 | (0 – 0)        | 49877    | (-9442 – 94779)   |
| No SSB intake***                                                        | 91225                   | (-22279 – 172519) | 0        | (0 – 0)        | 6308            | (3263 – 9099)   | 0                 | (0 – 0)        | 97533    | (-19015 – 181618) |
| * Combination “Minor changes” (sum)                                     | 135120                  | (643 – 216909)    | 0        | (0 – 0)        | 11963           | (5417 – 17102)  | 515               | (240 – 724)    | 147597   | (6300 – 234734)   |
| ** Combination “Moderate changes” (sum)                                 | 314341                  | (27147 – 486111)  | 12251    | (2758 – 20219) | 22456           | (10543 – 31207) | 966               | (468 – 1281)   | 350014   | (40917 – 538818)  |
| *** Combination “Extensive changes” (sum)                               | 665283                  | (136745 – 915854) | 12251    | (2758 – 20219) | 39682           | (19940 – 52484) | 1675              | (888 – 1912)   | 718891   | (160330 – 990469) |

SSB, sugar-sweetened beverages.

Replacements were of equal weight. Vegetables and legumes were 50:50. Numbers rounded to nearest 100.

<sup>#</sup>Replacement food category was neutral in the health impact model.

Table 1 (continued) Cumulative gains in YLL over 20 or 30 years, per sex and disease outcome

|                                                                         | Ischaemic heart disease |                    | Stroke   |                 | Diabetes type 2 |                  | Colorectal cancer |                  | Sum      |                    |
|-------------------------------------------------------------------------|-------------------------|--------------------|----------|-----------------|-----------------|------------------|-------------------|------------------|----------|--------------------|
|                                                                         | Estimate                | Lower-Upper        | Estimate | Lower-Upper     | Estimate        | Lower-Upper      | Estimate          | Lower-Upper      | Estimate | Lower-Upper        |
| Men, cumulative gains in YLL over 30 years                              |                         |                    |          |                 |                 |                  |                   |                  |          |                    |
| <b>Replacing red &amp; processed meat with poultry/fish<sup>#</sup></b> |                         |                    |          |                 |                 |                  |                   |                  |          |                    |
| 25% less red & processed meat*                                          | 249711                  | (13762 – 383236)   | 0        | (0 – 0)         | 23090           | (10250 – 32882)  | 8186              | (3515 – 12904)   | 280987   | (27526 – 429022)   |
| 50% less red & processed meat                                           | 474874                  | (27450 – 708027)   | 0        | (0 – 0)         | 42972           | (19867 – 59239)  | 15912             | (6945 – 24651)   | 533759   | (54262 – 791917)   |
| No red or processed meat                                                | 857798                  | (54485 – 1209869)  | 0        | (0 – 0)         | 74610           | (37266 – 97012)  | 29966             | (13519 – 44890)  | 962374   | (105270 – 1351772) |
| <b>Replacing red &amp; processed meat with vegetables</b>               |                         |                    |          |                 |                 |                  |                   |                  |          |                    |
| 25% less red & processed meat                                           | 321191                  | (43068 – 495852)   | 13625    | (3023 – 22774)  | 23090           | (10250 – 32882)  | 8186              | (3515 – 12904)   | 366092   | (59855 – 564412)   |
| 50% less red & processed meat**                                         | 601532                  | (85418 – 893018)   | 26760    | (6021 – 44178)  | 42972           | (19867 – 59239)  | 15912             | (6945 – 24651)   | 687176   | (118251 – 1021086) |
| No red or processed meat                                                | 1055329                 | (167885 – 1455739) | 51627    | (11947 – 83185) | 74610           | (37266 – 97012)  | 29966             | (13519 – 44890)  | 1211532  | (230617 – 1680827) |
| <b>Replacing red &amp; processed meat with vegetables and legumes</b>   |                         |                    |          |                 |                 |                  |                   |                  |          |                    |
| 25% less red & processed meat                                           | 422251                  | (94177 – 629497)   | 6875     | (1514 – 11563)  | 23090           | (10250 – 32882)  | 8186              | (3515 – 12904)   | 460402   | (109456 – 686846)  |
| 50% less red & processed meat                                           | 773336                  | (184909 – 1098399) | 13625    | (3023 – 22774)  | 42972           | (19867 – 59239)  | 15912             | (6945 – 24651)   | 845845   | (214743 – 1205063) |
| No red or processed meat***                                             | 1300821                 | (356321 – 1692539) | 26760    | (6021 – 44178)  | 74610           | (37266 – 97012)  | 29966             | (13519 – 44890)  | 1432157  | (413127 – 1878620) |
| <b>Replacing milk consumption with plant-based drink<sup>#</sup></b>    |                         |                    |          |                 |                 |                  |                   |                  |          |                    |
| 25% less milk intake*                                                   | 0                       | (0 – 0)            | 0        | (0 – 0)         | 0               | (0 – 0)          | -3655             | (-1405 – -6529)  | -3655    | (-1405 – -6529)    |
| 50% less milk intake**                                                  | 0                       | (0 – 0)            | 0        | (0 – 0)         | 0               | (0 – 0)          | -7399             | (-2822 – -13349) | -7399    | (-2822 – -13349)   |
| No milk intake***                                                       | 0                       | (0 – 0)            | 0        | (0 – 0)         | 0               | (0 – 0)          | -15188            | (-5700 – -27966) | -15188   | (-5700 – -27966)   |
| <b>Replacing SSB consumption with water<sup>#</sup></b>                 |                         |                    |          |                 |                 |                  |                   |                  |          |                    |
| 25% less SSB intake*                                                    | 52553                   | (-12322 – 102604)  | 0        | (0 – 0)         | 3639            | (1852 – 5331)    | 0                 | (0 – 0)          | 56192    | (-10471 – 107936)  |
| 50% less SSB intake**                                                   | 104223                  | (-24748 – 201466)  | 0        | (0 – 0)         | 7210            | (3690 – 10509)   | 0                 | (0 – 0)          | 111433   | (-21059 – 211975)  |
| No SSB intake***                                                        | 204045                  | (-49687 – 386695)  | 0        | (0 – 0)         | 14093           | (7290 – 20331)   | 0                 | (0 – 0)          | 218137   | (-42396 – 407026)  |
| * Combination “Minor changes” (sum)                                     | 302265                  | (1439 – 485840)    | 0        | (0 – 0)         | 26729           | (12102 – 38213)  | 4531              | (2110 – 6375)    | 333524   | (15650 – 530429)   |
| ** Combination “Moderate changes” (sum)                                 | 705755                  | (60669 – 1094484)  | 26760    | (6021 – 44178)  | 50182           | (23557 – 69748)  | 8514              | (4123 – 11302)   | 791210   | (94371 – 1219712)  |
| *** Combination “Extensive changes” (sum)                               | 1504865                 | (306634 – 2079234) | 26760    | (6021 – 44178)  | 88703           | (44557 – 117343) | 14778             | (7819 – 16924)   | 1635106  | (365031 – 2257679) |

SSB, sugar-sweetened beverages.

Replacements were of equal weight. Vegetables and legumes were 50:50. Numbers rounded to nearest 100.

<sup>#</sup>Replacement food category was neutral in the health impact model.
